# Supplementary material for: Double-Strand Break Repair Assays Determine Pathway Choice and Structure of Gene Conversion Events in Drosophila melanogaster
Source: PubMed Central journal article supplement (PMC3962482; doi:10.1534/g3.113.010074), 2013-12-24
Supplement: supp_g3.113.010074_010074SI.pdf [file supp_g3.113.010074_010074SI.pdf]

**Double-strand break repair assays determine pathway choice and structure of gene conversion events in *Drosophila melanogaster***

Anthony T. Do<sup>\*,1</sup>, Joseph T. Brooks<sup>\*,1</sup>, Margot K. Le Neveu<sup>\*</sup>, and Jeannine R. LaRocque<sup>\*</sup>

<sup>\*</sup>Department of Human Science, Georgetown University Medical Center, Washington, DC 20057

<sup>1</sup> These authors contributed equally to this work.

DOI: 10.1534/g3.113.010074

**Table S1 Silent mutations (mu) in DR-*white.mu***

| mu # | Distance (nt) from<br><i>SacI</i> site <sup>a</sup> | nt change <sup>b</sup> | Restriction site<br>change | mutagenic primer <sup>c</sup>         |
|------|-----------------------------------------------------|------------------------|----------------------------|---------------------------------------|
| 1    | -864                                                | C215A                  | <i>PstI</i> +              | 5'-GCAAACACCCATCTGCAGAGCATCTGAACAATGG |
| 2    | -732                                                | A347G                  | <i>NheI</i> +              | 5'-GTTCAGGGAGCGGCCAGCTAGCCGAGAACC     |
| 3    | -693                                                | C386T                  | <i>EcoRV</i> +             | 5'-CTGGCACAATATGGATATCTTTGGGGCGGTC    |
| 4    | -645                                                | C434T                  | <i>HpaI</i> +              | 5'-GGCGGCAGCTGGTTAACCGGACACGCGGAC     |
| 5    | -558                                                | T521C                  | <i>SmaI</i> +              | 5'-TTTGGCGCGTGGCCTACCCGGGCGAACTTTTG   |
| 6    | -516                                                | A563C                  | <i>NaeI</i> +              | 5'-GTTCCGGTGCCGGCAAGACGACCCTGCTG      |
| 7    | -471                                                | C608G                  | <i>BamHI</i> +             | 5'-TTTCGATCGCCGAGGGGATCCAAGTATCG      |
| 8    | -423                                                | G656C                  | <i>Sall</i> +              | 5'-GGCCAACCTGTCGACGCCAAGGAGATGC       |
| 9    | -363                                                | C716A                  | <i>BamHI</i> +             | 5'-TGACCTTTTATCGGATCCCTAACGGCCAG      |
| 10   | -327                                                | C752T                  | <i>NcoI</i> -              | 5'-GATTTTCCAGGCTATGGTGC GGATGCCACG    |
| 11   | -276                                                | G803T                  | <i>BclI</i> +              | 5'-GAGTGGCCCGCTTGATCAGGTGATCCAGG      |
| 12   | -201                                                | T878C                  | <i>StuI</i> +              | 5'-CAGGGTGAAGGCCCTGTCCGGCGGAGAAAG     |
| 13   | -150                                                | C929G                  | <i>BamHI</i> +             | 5'-CCTCCGAGGCACTAACGGATCCGCCCTTC      |
| 14   | -63                                                 | G1016T                 | <i>HindIII</i> +           | 5'-GTGCTGAAGAAGCTTTCGCAGAAGGGCAAG     |
| 15   | +32                                                 | A1110C                 | <i>NciI</i> +              | 5'-TCTGATGGCCGAGGGCCGGGTAGCTTTC       |
| 16   | +67                                                 | C1145G                 | <i>Sall</i> -              | 5'-CCCAGCGAAGCCGTGGACTCTTTTCTAC       |
| 17   | +118                                                | G1196C                 | <i>EagI</i> +              | 5'-CTACAATCCGGCCGACTTTTACGTACAGG      |
| 18   | +190                                                | A1268C                 | <i>BglII</i> +             | 5'-CGGATCGCCAAGATCTGCGACAATTTTGC      |
| 19   | +236                                                | T1314C                 | <i>PvuII</i> +             | 5'-CCGGGATATGGAGCAGCTGTTGGCCACC       |
| 20   | +304                                                | C1382G                 | <i>PmlI</i> +              | 5'-CCTACAAGGCCACGTGGTTCATGCAGTTCC     |
| 21   | +367                                                | C1445T                 | <i>XmnI</i> +              | 5'-CTCAAGGAACCACTTCTCGTAAAAGTGCG      |
| 22   | +397                                                | G1475C                 | <i>NcoI</i> +              | 5'-CTTATTCAGACAACCATGGTTGCCATCTTG     |
| 23   | +472                                                | A1550C                 | <i>HaeIII</i> +            | 5'-TGAATATCAACGGCCCATCTTCTCTTCC       |
| 24   | +547                                                | G1625C                 | <i>SacI</i> +              | 5'-TTCACCTCAGAGCTCCAGTTTTTATGAGG      |
| 25   | +613                                                | G1691A                 | <i>MfeI</i> +              | 5'-CTGGGCAAAACAATTGCCGAATTGCCGC       |
| 26   | +694                                                | A1772C                 | <i>NaeI</i> +              | 5'-GACTGCGGGCCGGCTGCTGCACTTCTTC       |
| 27   | +760                                                | A1838G                 | <i>EcoRV</i> -             | 5'-GTGTCAACGTCCTTCGGGTATCTAATATCC     |
| 28   | +859                                                | C1937T                 | <i>EcoRI</i> +             | 5'-CGGCTTCTTCTGAATTCGGGCTCGGTGCC      |

<sup>a</sup> Distance from I-SceI site is determined by the location of the polymorphism relative to the wild-type *SacI* cleavage site in *white* cDNA site used to create *Scw.white* (*SacI* cleavage = 0, upstream of *SacI* cleavage = -, downstream of *SacI* cleavage = +).

<sup>b</sup> nucleotide change is determined by the nucleotide number of wild-type *white* mRNA sequence.

<sup>c</sup> forward primer given. Mutation is in red. Restriction site change is underlined.

**Table S2 Total flies scored for each DSB repair phenotype**

| Genotype           | DSB repair assay    | Exp. no.         | No. progeny scored<br>(No. of individual germlines) | Total number of each phenotype<br>(% of total) |                                  |                     |
|--------------------|---------------------|------------------|-----------------------------------------------------|------------------------------------------------|----------------------------------|---------------------|
|                    |                     |                  |                                                     | y+ w-<br>NHEJ,<br>intersister HR,<br>no DSB    | y+ w+<br>intra-chromosomal<br>HR | y- w-<br>SSA        |
| wild type          | DR- <i>white</i>    | 1                | 1409 (18)                                           | 788 (55.9)                                     | 558 (39.6)                       | 63 (4.47)           |
|                    |                     | 2                | 891 (23)                                            | 509 (57.1)                                     | 349 (39.2)                       | 33 (3.70)           |
|                    |                     | 3                | 1659 (30)                                           | 929 (56.0)                                     | 699 (42.1)                       | 31 (1.87)           |
|                    |                     | 4                | 1726 (49)                                           | 1034 (59.9)                                    | 649 (37.6)                       | 43 (2.49)           |
|                    |                     | <b>total</b>     | <b>5685 (120)</b>                                   | <b>3260 (57.3)</b>                             | <b>2255 (39.7)</b>               | <b>170 (3.00)</b>   |
|                    |                     | <b>mean %</b>    |                                                     | <b>57.2 (±0.93)</b>                            | <b>39.4</b>                      | <b>3.13 (±0.59)</b> |
|                    |                     | <b>(±S.E.M.)</b> |                                                     |                                                | <b>(±0.90)</b>                   |                     |
|                    | DR- <i>white.mu</i> | 1                | 1441 (19)                                           | 1023 (71.0)                                    | 365 (25.3)                       | 53 (3.68)           |
|                    |                     | 2                | 602 (21)                                            | 416 (69.1)                                     | 162 (26.9)                       | 24 (3.99)           |
|                    |                     | 3                | 1226 (28)                                           | 850 (69.3)                                     | 362 (29.5)                       | 14 (1.14)           |
| <b>total</b>       |                     | <b>3269 (68)</b> | <b>2289 (70.0)</b>                                  | <b>889 (27.2)</b>                              | <b>91 (2.78)</b>                 |                     |
| <b>mean %</b>      |                     |                  | <b>69.8 (±0.60)</b>                                 | <b>27.1</b>                                    | <b>2.9 (±0.91)</b>               |                     |
|                    | <b>(±S.E.M.)</b>    |                  |                                                     | <b>(±1.18)</b>                                 |                                  |                     |
| <i>spn-A/+</i>     | DR- <i>white</i>    | 1                | 710 (18)                                            | 398 (56.1)                                     | 293 (41.3)                       | 19 (2.68)           |
|                    |                     | 2                | 893 (20)                                            | 627 (70.2)                                     | 238 (26.7)                       | 28 (3.14)           |
|                    |                     | 3                | 401 (14)                                            | 246 (61.3)                                     | 139 (34.7)                       | 16 (4.00)           |
|                    |                     | <b>total</b>     | <b>2004 (52)</b>                                    | <b>1271 (63.1)</b>                             | <b>670 (33.3)</b>                | <b>63 (3.13)</b>    |
|                    |                     | <b>mean %</b>    |                                                     | <b>62.5 (±4.13)</b>                            | <b>34.2</b>                      | <b>3.35 (±0.46)</b> |
|                    | <b>(±S.E.M.)</b>    |                  |                                                     | <b>(±4.23)</b>                                 |                                  |                     |
| <i>spn-A/spn-A</i> | DR- <i>white</i>    | 1                | 625 (17)                                            | 391 (62.6)                                     | 3 (0.48)                         | 231 (37.0)          |
|                    |                     | 2                | 1157 (27)                                           | 788 (68.1)                                     | 15 (1.30)                        | 354 (30.6)          |
|                    |                     | 3                | 631 (18)                                            | 401 (63.5)                                     | 5 (0.79)                         | 225 (35.7)          |
|                    |                     | <b>total</b>     | <b>2413 (62)</b>                                    | <b>1580 (65.5)</b>                             | <b>23 (0.95)</b>                 | <b>810 (33.6)</b>   |
|                    |                     | <b>mean %</b>    |                                                     | <b>64.7 (±1.71)</b>                            | <b>0.86</b>                      | <b>34.4 (±1.94)</b> |
|                    | <b>(±S.E.M.)</b>    |                  |                                                     | <b>(±0.24)</b>                                 |                                  |                     |
