# Supplementary material for: Double-Strand Break Repair Assays Determine Pathway Choice and Structure of Gene Conversion Events in Drosophila melanogaster
Source: PubMed Central journal article supplement (PMC3962482; doi:10.1534/g3.113.010074), 2013-12-24
Supplement: supp_g3.113.010074_TableS1.pdf [file supp_g3.113.010074_TableS1.pdf]

**Table S1 Silent mutations (mu) in DR-*white.mu***

| mu # | Distance (nt) from<br><i>SacI</i> site <sup>a</sup> | nt change <sup>b</sup> | Restriction site<br>change | mutagenic primer <sup>c</sup>         |
|------|-----------------------------------------------------|------------------------|----------------------------|---------------------------------------|
| 1    | -864                                                | C215A                  | <i>PstI</i> +              | 5'-GCAAACACCCATCTGCAGAGCATCTGAACAATGG |
| 2    | -732                                                | A347G                  | <i>NheI</i> +              | 5'-GTTCAGGGAGCGGCCAGCTAGCCGAGAACC     |
| 3    | -693                                                | C386T                  | <i>EcoRV</i> +             | 5'-CTGGCACAATATGGATATCTTTGGGGCGGTC    |
| 4    | -645                                                | C434T                  | <i>HpaI</i> +              | 5'-GGCGGCAGCTGGTTAACCGGACACGCGGAC     |
| 5    | -558                                                | T521C                  | <i>SmaI</i> +              | 5'-TTTGGCGCGTGGCCTACCCGGGCGAACTTTTG   |
| 6    | -516                                                | A563C                  | <i>NaeI</i> +              | 5'-GTTCCGGTGCCGGCAAGACGACCCTGCTG      |
| 7    | -471                                                | C608G                  | <i>BamHI</i> +             | 5'-TTTCGATCGCCGAGGGGATCCAAGTATCG      |
| 8    | -423                                                | G656C                  | <i>Sall</i> +              | 5'-GGCCAACCTGTCGACGCCAAGGAGATGC       |
| 9    | -363                                                | C716A                  | <i>BamHI</i> +             | 5'-TGACCTTTTATCGGATCCCTAACGGCCAG      |
| 10   | -327                                                | C752T                  | <i>NcoI</i> -              | 5'-GATTTTCCAGGCTATGGTGC GGATGCCACG    |
| 11   | -276                                                | G803T                  | <i>BclI</i> +              | 5'-GAGTGGCCCGCTTGATCAGGTGATCCAGG      |
| 12   | -201                                                | T878C                  | <i>StuI</i> +              | 5'-CAGGGTGAAGGCCCTGTCCGGCGGAGAAAG     |
| 13   | -150                                                | C929G                  | <i>BamHI</i> +             | 5'-CCTCCGAGGCACTAACGGATCCGCCCTTC      |
| 14   | -63                                                 | G1016T                 | <i>HindIII</i> +           | 5'-GTGCTGAAGAAGCTTTCGCAGAAGGGCAAG     |
| 15   | +32                                                 | A1110C                 | <i>NciI</i> +              | 5'-TCTGATGGCCGAGGGCCGGGTAGCTTTC       |
| 16   | +67                                                 | C1145G                 | <i>Sall</i> -              | 5'-CCCAGCGAAGCCGTGGACTCTTTTCCTAC      |
| 17   | +118                                                | G1196C                 | <i>EagI</i> +              | 5'-CTACAATCCGGCCGACTTTTACGTACAGG      |
| 18   | +190                                                | A1268C                 | <i>BglII</i> +             | 5'-CGGATCGCCAAGATCTGCGACAATTTTGC      |
| 19   | +236                                                | T1314C                 | <i>PvuII</i> +             | 5'-CCGGGATATGGAGCAGCTGTTGGCCACC       |
| 20   | +304                                                | C1382G                 | <i>PmlI</i> +              | 5'-CCTACAAGGCCACGTGGTTTCATGCAGTTCC    |
| 21   | +367                                                | C1445T                 | <i>XmnI</i> +              | 5'-CTCAAGGAACCACTTCTCGTAAAAGTGCG      |
| 22   | +397                                                | G1475C                 | <i>NcoI</i> +              | 5'-CTTATTCAGACAACCATGGTTGCCATCTTG     |
| 23   | +472                                                | A1550C                 | <i>HaeIII</i> +            | 5'-TGAATATCAACGGCCCATCTTCTCTTCC       |
| 24   | +547                                                | G1625C                 | <i>SacI</i> +              | 5'-TTCACCTCAGAGCTCCAGTTTTTATGAGG      |
| 25   | +613                                                | G1691A                 | <i>MfeI</i> +              | 5'-CTGGGCAAAACAATTGCCGAATTGCCGC       |
| 26   | +694                                                | A1772C                 | <i>NaeI</i> +              | 5'-GACTGCGGGCCGGCTGCTGCACTTCTTC       |
| 27   | +760                                                | A1838G                 | <i>EcoRV</i> -             | 5'-GTGTCAACGTCCTTCGGGTATCTAATATCC     |
| 28   | +859                                                | C1937T                 | <i>EcoRI</i> +             | 5'-CGGCTTCTTCTGAATTCGGGCTCGGTGCC      |

<sup>a</sup> Distance from I-SceI site is determined by the location of the polymorphism relative to the wild-type *SacI* cleavage site in *white* cDNA site used to create *Scw.white* (*SacI* cleavage = 0, upstream of *SacI* cleavage = -, downstream of *SacI* cleavage = +).

<sup>b</sup> nucleotide change is determined by the nucleotide number of wild-type *white* mRNA sequence.

<sup>c</sup> forward primer given. Mutation is in red. Restriction site change is underlined.
