# Supplementary material for: Double-Strand Break Repair Assays Determine Pathway Choice and Structure of Gene Conversion Events in Drosophila melanogaster
Source: PubMed Central journal article supplement (PMC3962482; doi:10.1534/g3.113.010074), 2013-12-24
Supplement: supp_g3.113.010074_TableS2.pdf [file supp_g3.113.010074_TableS2.pdf]

**Table S2 Total flies scored for each DSB repair phenotype**

| Genotype           | DSB repair assay    | Exp. no.         | No. progeny scored<br>(No. of individual germlines) | Total number of each phenotype<br>(% of total) |                                  |                     |
|--------------------|---------------------|------------------|-----------------------------------------------------|------------------------------------------------|----------------------------------|---------------------|
|                    |                     |                  |                                                     | y+ w-<br>NHEJ,<br>intersister HR,<br>no DSB    | y+ w+<br>intra-chromosomal<br>HR | y- w-<br>SSA        |
| wild type          | DR- <i>white</i>    | 1                | 1409 (18)                                           | 788 (55.9)                                     | 558 (39.6)                       | 63 (4.47)           |
|                    |                     | 2                | 891 (23)                                            | 509 (57.1)                                     | 349 (39.2)                       | 33 (3.70)           |
|                    |                     | 3                | 1659 (30)                                           | 929 (56.0)                                     | 699 (42.1)                       | 31 (1.87)           |
|                    |                     | 4                | 1726 (49)                                           | 1034 (59.9)                                    | 649 (37.6)                       | 43 (2.49)           |
|                    |                     | <b>total</b>     | <b>5685 (120)</b>                                   | <b>3260 (57.3)</b>                             | <b>2255 (39.7)</b>               | <b>170 (3.00)</b>   |
|                    |                     | <b>mean %</b>    |                                                     | <b>57.2 (±0.93)</b>                            | <b>39.4</b>                      | <b>3.13 (±0.59)</b> |
|                    |                     | <b>(±S.E.M.)</b> |                                                     |                                                | <b>(±0.90)</b>                   |                     |
|                    | DR- <i>white.mu</i> | 1                | 1441 (19)                                           | 1023 (71.0)                                    | 365 (25.3)                       | 53 (3.68)           |
|                    |                     | 2                | 602 (21)                                            | 416 (69.1)                                     | 162 (26.9)                       | 24 (3.99)           |
|                    |                     | 3                | 1226 (28)                                           | 850 (69.3)                                     | 362 (29.5)                       | 14 (1.14)           |
| <b>total</b>       |                     | <b>3269 (68)</b> | <b>2289 (70.0)</b>                                  | <b>889 (27.2)</b>                              | <b>91 (2.78)</b>                 |                     |
| <b>mean %</b>      |                     |                  | <b>69.8 (±0.60)</b>                                 | <b>27.1</b>                                    | <b>2.9 (±0.91)</b>               |                     |
|                    | <b>(±S.E.M.)</b>    |                  |                                                     | <b>(±1.18)</b>                                 |                                  |                     |
| <i>spn-A/+</i>     | DR- <i>white</i>    | 1                | 710 (18)                                            | 398 (56.1)                                     | 293 (41.3)                       | 19 (2.68)           |
|                    |                     | 2                | 893 (20)                                            | 627 (70.2)                                     | 238 (26.7)                       | 28 (3.14)           |
|                    |                     | 3                | 401 (14)                                            | 246 (61.3)                                     | 139 (34.7)                       | 16 (4.00)           |
|                    |                     | <b>total</b>     | <b>2004 (52)</b>                                    | <b>1271 (63.1)</b>                             | <b>670 (33.3)</b>                | <b>63 (3.13)</b>    |
|                    |                     | <b>mean %</b>    |                                                     | <b>62.5 (±4.13)</b>                            | <b>34.2</b>                      | <b>3.35 (±0.46)</b> |
|                    | <b>(±S.E.M.)</b>    |                  | <b>(±4.23)</b>                                      |                                                |                                  |                     |
| <i>spn-A/spn-A</i> | DR- <i>white</i>    | 1                | 625 (17)                                            | 391 (62.6)                                     | 3 (0.48)                         | 231 (37.0)          |
|                    |                     | 2                | 1157 (27)                                           | 788 (68.1)                                     | 15 (1.30)                        | 354 (30.6)          |
|                    |                     | 3                | 631 (18)                                            | 401 (63.5)                                     | 5 (0.79)                         | 225 (35.7)          |
|                    |                     | <b>total</b>     | <b>2413 (62)</b>                                    | <b>1580 (65.5)</b>                             | <b>23 (0.95)</b>                 | <b>810 (33.6)</b>   |
|                    |                     | <b>mean %</b>    |                                                     | <b>64.7 (±1.71)</b>                            | <b>0.86</b>                      | <b>34.4 (±1.94)</b> |
|                    | <b>(±S.E.M.)</b>    |                  | <b>(±0.24)</b>                                      |                                                |                                  |                     |
